# Supplementary material for: Integrating Outcome-Based Education (OBE) and Problem-Based Learning (PBL) in Psychiatric Clinical Practice Teaching: An Empirical Study
Source: Research Square preprint supplement (doi:10.21203/rs.3.rs-7223072/v1), 2025-08-22
Supplement: Supplementary file 1 [file b935be5d504022740268cbfc.docx]

**Learning Situation and Career Planning Questionnaire For psychiatric interns at Huai'an Clinical College of Mental Health**

| **Name** |  | **Gender** | **□Male□Female** | **Professional**  **Headshot** |
| --- | --- | --- | --- | --- |
| **Day Of Birth** |  | **Age** |  |
| **Student ID** |  | **Origin** |  |
| **University** |  | | |
| **Department** |  | | |
| **Earned Credits** |  | **English Level** |  |
| **Post Address** |  | | **Zip code** |  |
| **Telephone** |  | **E-mail** |  | |
| **GPA_Year4** | **Please fill in your average score (%) for all courses in the 4th year of undergraduate study. ( ) / 100** | | | |
| **Leadership** | **Held student leadership position(s) during undergraduate studies?**  **□ Yes (Specify: ) □ No** | | | |
| **Research Engagement** | | | | |
| - **Received formal research training (e.g., methodology, statistics)**   **□ Yes ( ) □ No**   - **Participated in research projects (e.g., data collection, literature review)**   **□ Yes ( ) □ No**   - **Authored/co-authored academic publications**   **□ Yes ( ) □ No**   - **Presented findings at conferences**   **□ Yes ( ) □ No**   - **Others**   **□ Yes ( ) □ No** | | | | |
| **Psychiatric Clinical Exposure** | | | | |
| - **Inpatient rotation**   **□ Schizophrenia unit □ Mood disorders unit □ Geriatric psychiatry**  **□ Others**   - **Outpatient training □ Initial assessments □ Follow-up management** - **Specialized skills □ MECT observation □ Risk assessment □ CBT basics** - **Clinical documentation □ SOAP notes □ Discharge summaries** - **Others** | | | | |
| **Team Participation** | | | | |
| - **Research teams involvement:**   **☐ University research lab (e.g., neuroscience lab)**  **( PI: )**  **☐ Multi-center clinical trial**  **( PI: )**  **☐ Independent student project**  **( PI: )**  **☐ None**   - **Clinical teams experience:**   **☐ Interdisciplinary case conferences**  **( PI: )**  **☐ Crisis intervention team**  **( PI: )**  **☐ Community mental health service**  **( PI: )**  **☐ Inpatient ward rounds**  **( PI: )**  **☐ None** | | | | |
| **The Special Work Skills You Have**?  (s.g. Psychological therapy) | | | | |
| - **SKILL 1.** - **SKILL 2.** - **SKILL 3.** - **SKILL 4.** | | | | |
| *****Please describe your interested subjects** | | | | |
| **Select ALL applicable options AND number your top choices in order of priority (1=highest).**  **□ Pursue postgraduate studies (Master/PhD)**  **□ Employment in tertiary hospital**  **□ Employment in secondary hospital**  **□ Standardized residency training**  **□ Other: ________** | | | | |
| **Please document your key academic achievements and awards** | | | | |
| - **ACADEMIC ACHIEVEMENTS**   **1.**  **2.**  **3.**  **4.**   - **HONORS & AWARDS**   **1.**  **2.**  **3.**  **4.** | | | | |

|  |
| --- |

**Informed Consent**

"I voluntarily participate in this study and authorize the use of anonymized data for research purposes. I understand that I may withdraw at any time without penalty. All data will be stored securely per Huai'an No.3 People's Hospital Ethics Committee guidelines (Approval 2023002)."

Signature: Date:
